# Supplementary material for: First-principles prediction of a room-temperature ferromagnetic and ferroelastic 2D multiferroic MnNX (X = F, Cl, Br, and I)
Source: Royal Society of Chemistry journal article supplement (doi:10.1039/d0nr06268e), 2020-01-01
Supplement: d0nr06268e1.pdf [file d0nr06268e1.pdf]

## Supporting Information

### First-principles prediction of a room-temperature ferromagnetic and ferroelastic 2D multiferroic MnNX (X=F, Cl, Br, I)

Minglang Hu,<sup>a</sup> Shaowen Xu,<sup>a</sup> Chao Liu,<sup>a</sup> Guodong Zhao,<sup>a</sup> Jiahui Yu,<sup>a</sup> and Wei Ren<sup>\*a</sup>

<sup>a</sup>*Physics Department, Shanghai Key Laboratory of High Temperature Superconductors, State Key Laboratory of Advanced Special Steel, International Centre of Quantum and Molecular Structures, Shanghai University, Shanghai 200444, China*

\*Email: [renwei@shu.edu.cn](mailto:renwei@shu.edu.cn)

**Table S1** The calculated elastic constants  $C_{ij}$  (N/m) and total energy (eV) of FM and collinear AFM<sub>i</sub> (i=1, 2, 3, 4) configurations for MnNX (X= F, Cl, Br, I) monolayers using a 2×2×1 supercell.

| Monolayer | $C_{11}$ | $C_{12}$ | $C_{22}$ | $C_{44}$ | $E_{\text{FM}}$ | $E_{\text{AFM1}}$ | $E_{\text{AFM2}}$ | $E_{\text{AFM3}}$ | $E_{\text{AFM4}}$ |
|-----------|----------|----------|----------|----------|-----------------|-------------------|-------------------|-------------------|-------------------|
| MnNF      | 183      | 25       | 162      | 51       | 0               | 1.02              | 0.65              | 1.10              | 1.35              |
| MnNCl     | 172      | 24       | 131      | 46       | 0               | 0.93              | 0.69              | 1.05              | 1.37              |
| MnNBr     | 155      | 17       | 108      | 43       | 0               | 1.12              | 0.80              | 1.16              | 1.45              |
| MnNI      | 145      | 18       | 81       | 39       | 0               | 0.73              | 0.62              | 0.96              | 0.95              |

**Table S2** The structural parameters (Å) of initial state (IS) and transition state (TS), ferroelastic energy barriers (meV/atom) and reversible ferroelastic strain.

| Monolayer | Initial state   |                 | Transition state |                 | Barrier | Strain |
|-----------|-----------------|-----------------|------------------|-----------------|---------|--------|
|           | $a_{\text{IS}}$ | $b_{\text{TS}}$ | $a_{\text{TS}}$  | $b_{\text{TS}}$ |         |        |
| MnNF      | 3.88            | 2.93            | 3.53             | 3.53            | 336     | 32.3%  |
| MnNCl     | 3.86            | 3.15            | 3.64             | 3.64            | 145     | 22.6%  |
| MnNBr     | 3.88            | 3.31            | 3.70             | 3.70            | 87      | 17.2%  |
| MnNI      | 3.90            | 3.52            | 3.75             | 3.75            | 31      | 10.8%  |

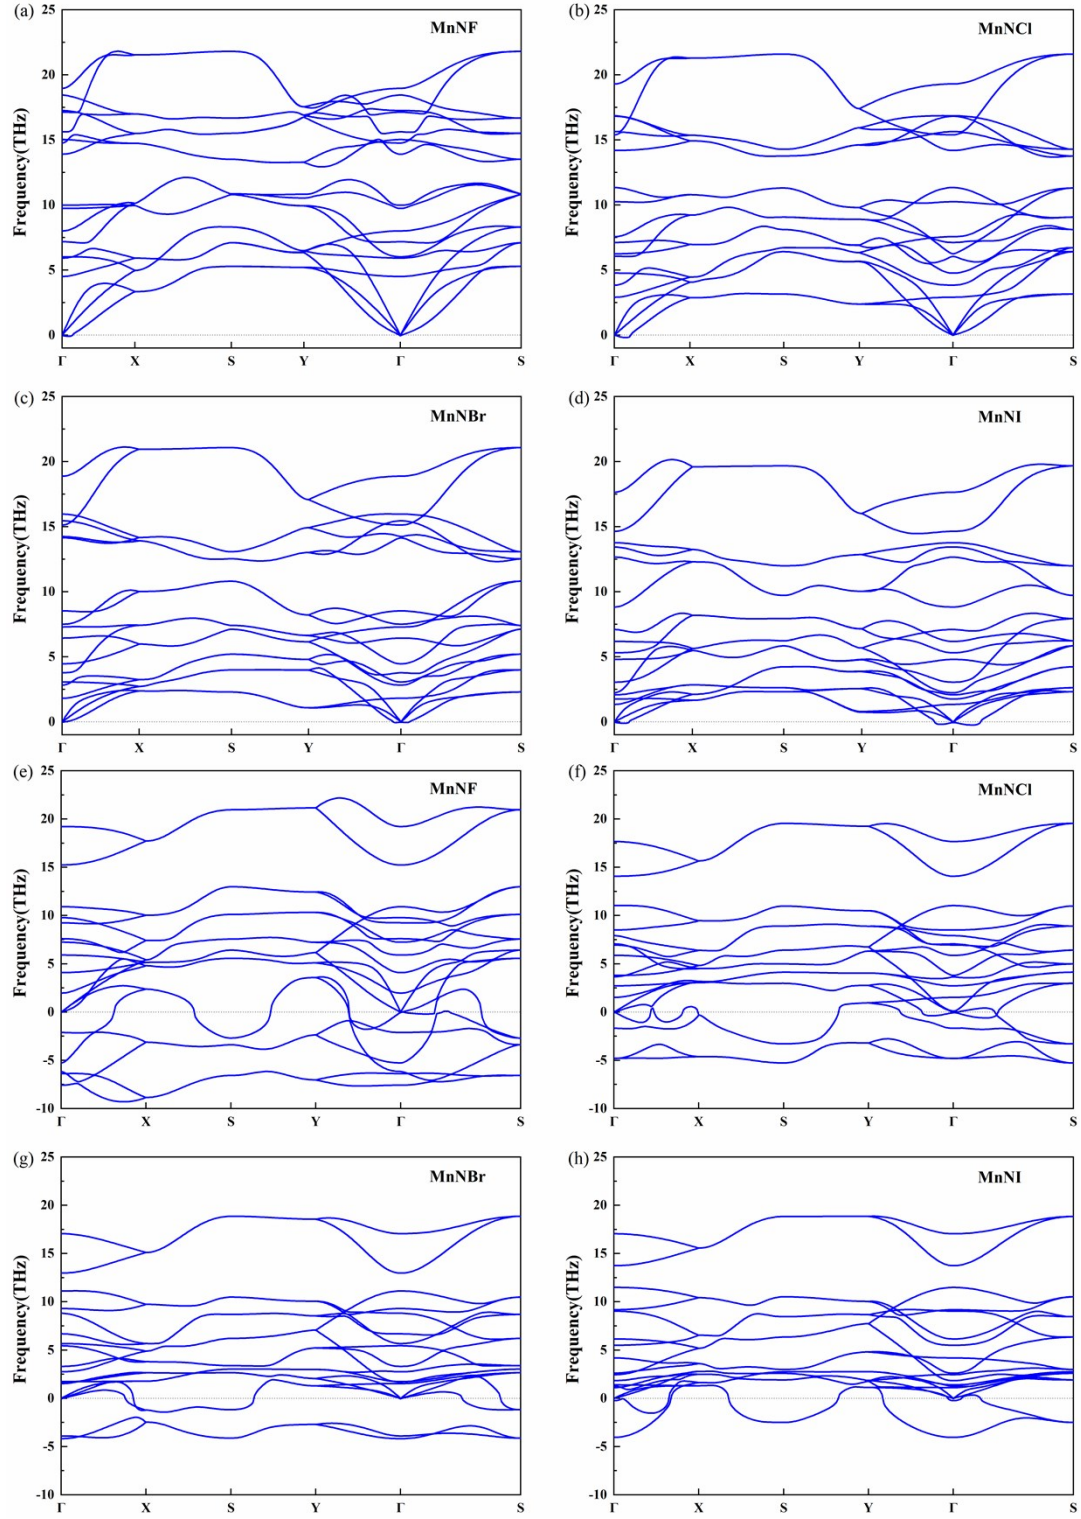

**Fig. S1** The full phonon dispersions of (a)-(d) initial ferroelastic states and (e)-(h) transition states for MnNX monolayers.

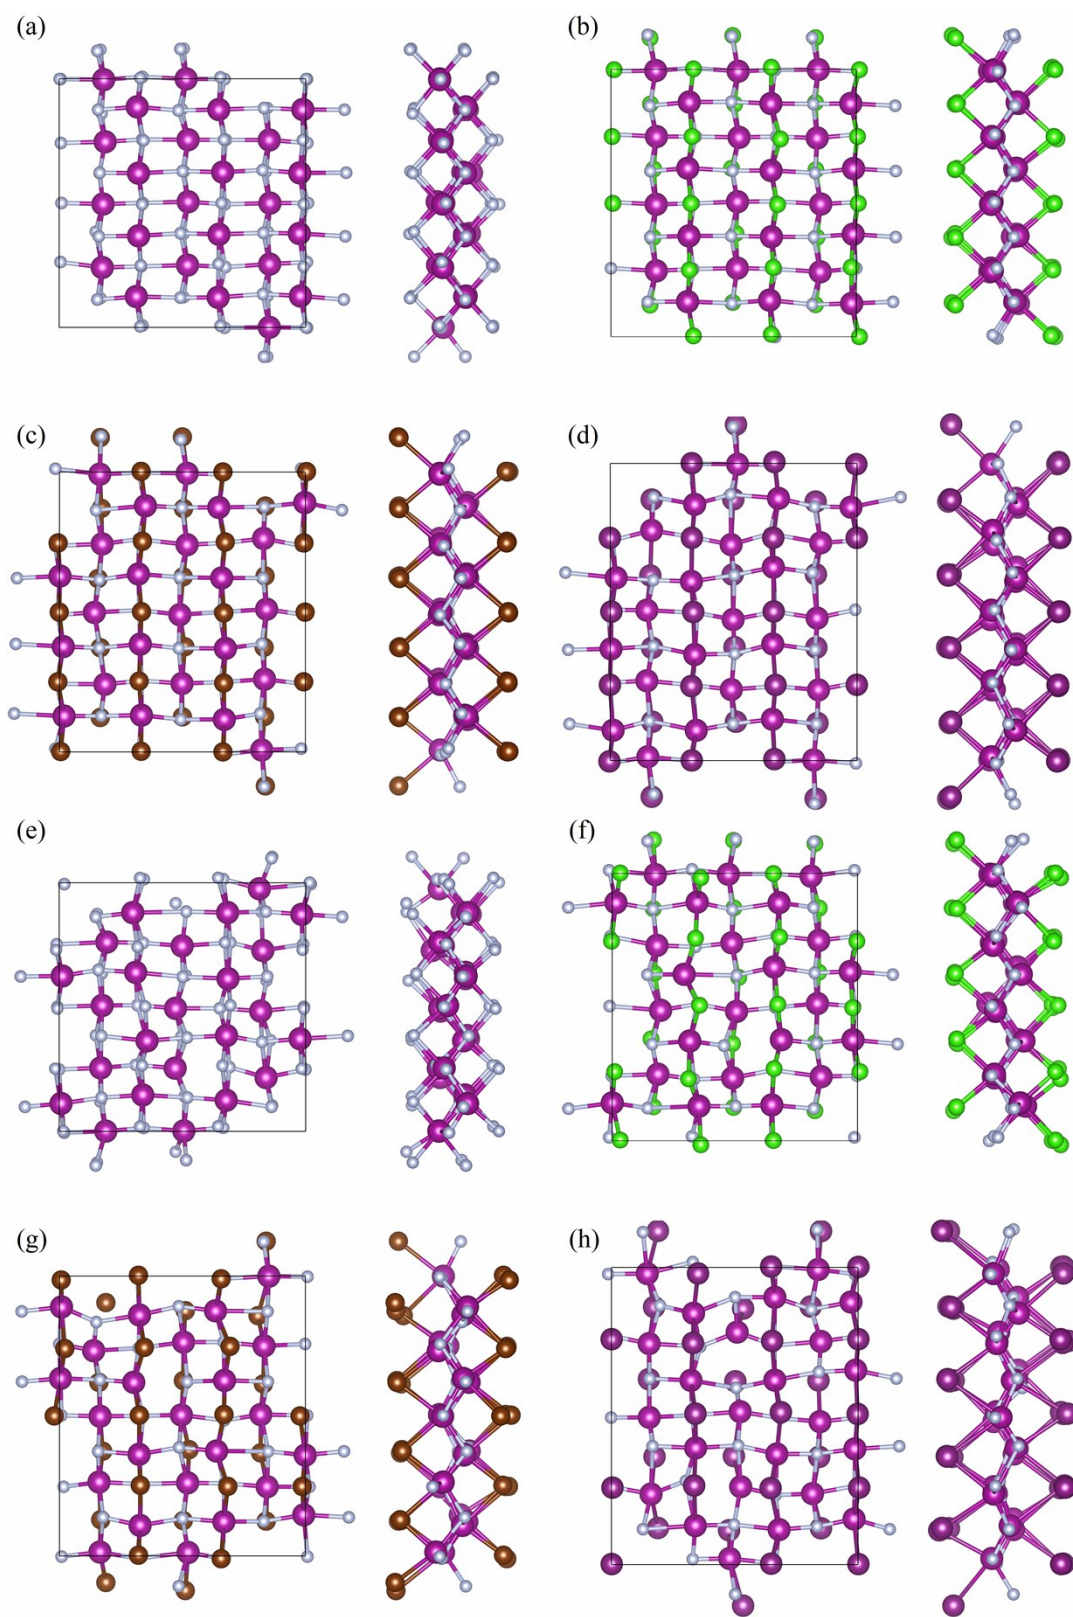

**Fig. S2** Snapshots of MnNF, MnNCl, MnNBr, and MnNI monolayers after 10 ps AIMD simulations (a)-(d) at 300K, and (e)-(h) at 1000K.



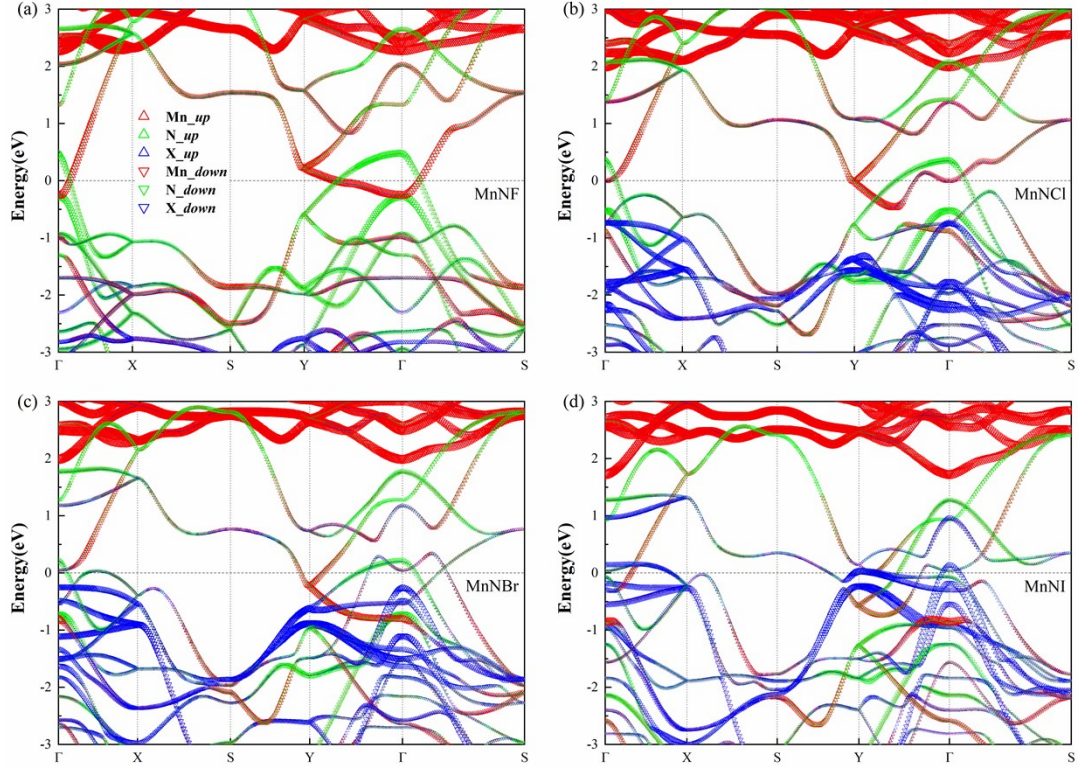

**Fig. S3** The projected electronic energy band structure of MnNX monolayers calculated with the GGA+U functional ( $U=3.9$  eV).

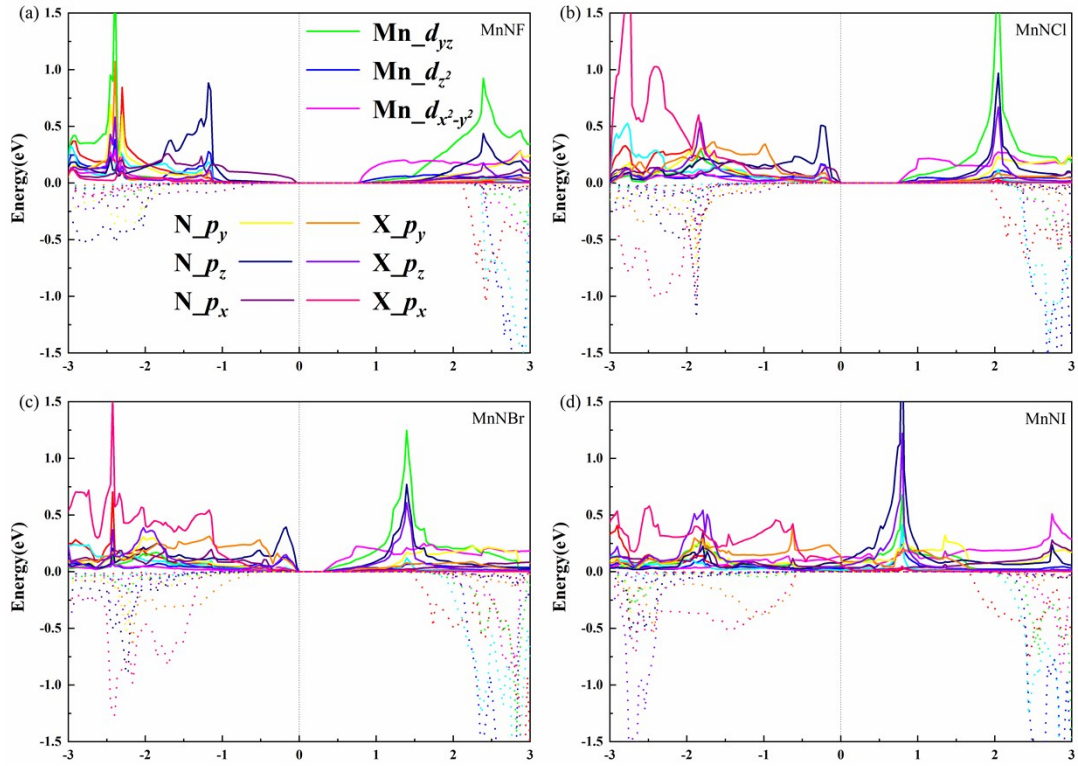

**Fig. S4** The projected density of states (DOS) of MnNX monolayers calculated with the HSE06 functional.

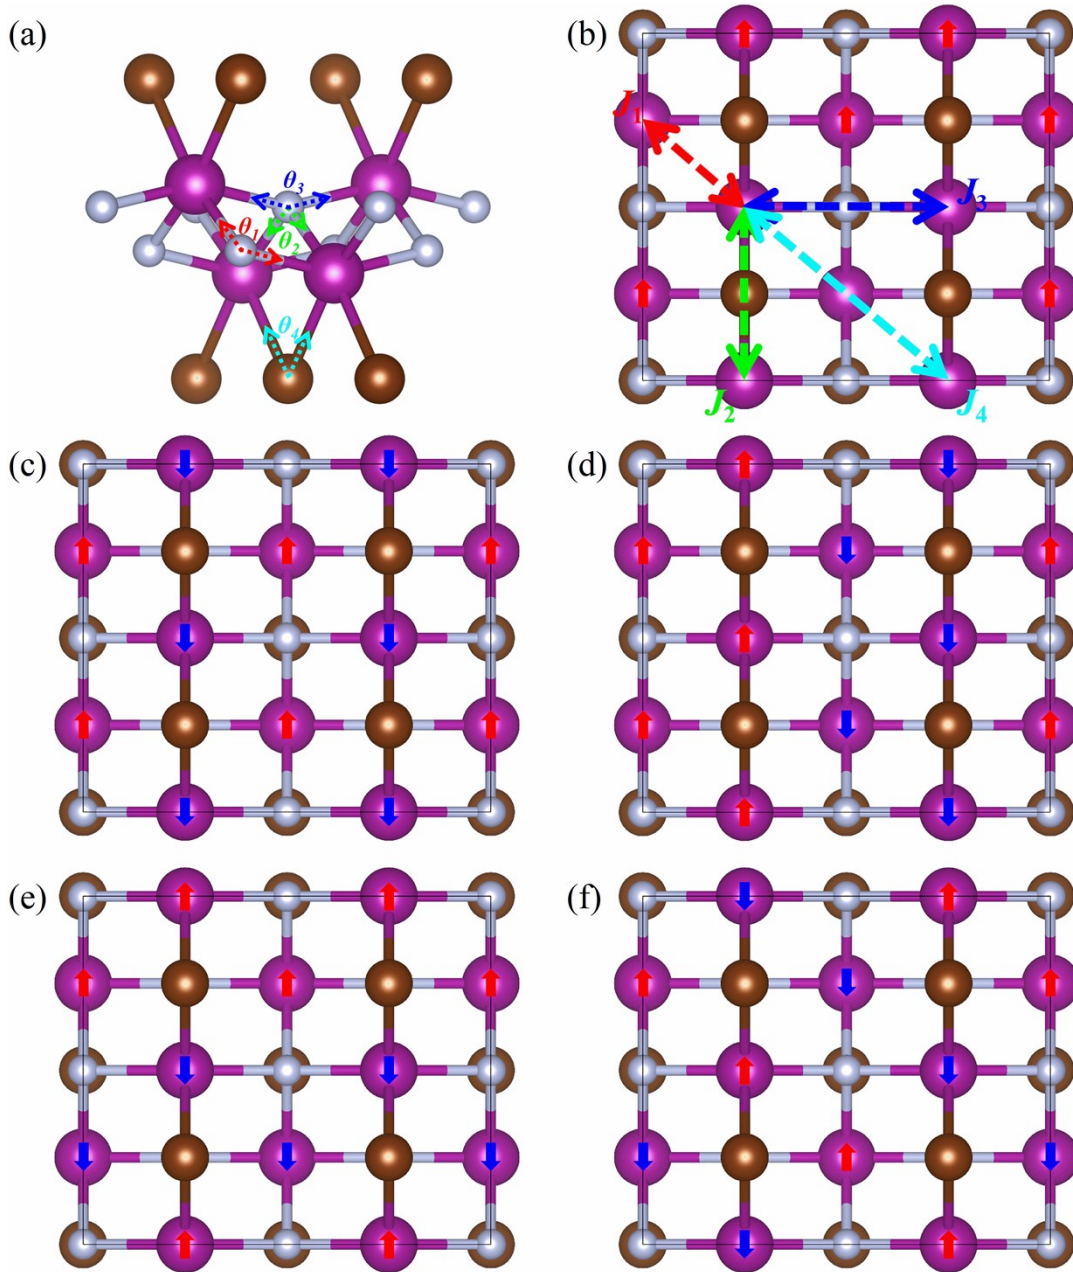

**Fig. S5** (a) The schematic structures of Mn–N(Br)–Mn bridges, with the four bond angles labeled as  $\theta_1$ ,  $\theta_2$ ,  $\theta_3$  and  $\theta_4$ . (b) The top view shows  $J_1$ ,  $J_2$ ,  $J_3$ , and  $J_4$  representing the first, second, third and fourth nearest couplings of Mn, respectively. The initial magnetic configurations of FM and collinear AFM<sub>i</sub> ( $i=1, 2, 3, 4$ ) for MnNX monolayers within a  $2 \times 2 \times 1$  supercell are shown in (b)-(f).

We employ the Ising model and the anisotropic Heisenberg model to predict the Curie temperature ( $T_C$ ). Our Ising model simulation results give quite high  $T_C$  values from 486 to 758 K, however, the anisotropy is greatly overestimated which results in the  $T_C$  value being about twice the anisotropic Heisenberg result. We calculate the spin exchange parameters according to the total energies of the five magnetic configurations in Table S1 which are schematically shown in the Fig. S5. The magnetic energy contributions of these magnetic

configurations in each magnetic unit cell is written as:

$$\begin{aligned}
E_0 - 9J_1 - 4.5J_2 - 4.5J_3 - 9J_4 - 2.25A &= E_{\text{FM}}, \\
E_0 + 9J_1 - 4.5J_2 - 4.5J_3 - 9J_4 - 2.25A &= E_{\text{AFM1}}, \\
E_0 - 0J_1 + 4.5J_2 - 4.5J_3 + 9J_4 - 2.25A &= E_{\text{AFM2}}, \\
E_0 - 0J_1 - 4.5J_2 + 4.5J_3 + 9J_4 - 2.25A &= E_{\text{AFM3}}, \\
E_0 - 0J_1 + 4.5J_2 + 4.5J_3 - 9J_4 - 2.25A &= E_{\text{AFM4}},
\end{aligned}$$

where  $E_0$  is the energy of the nonmagnetic state,  $A$  is the anisotropy energy parameter,  $J_1$ ,  $J_2$ ,  $J_2$  and  $J_4$  represent the first-, second-, third-, and fourth- nearest couplings, respectively, as shown in Fig. S5(a).
